# Supplementary material for: Designing dynamic coordination bonds in polar hybrid crystals for a high-temperature ferroelastic transition
Source: Royal Society of Chemistry journal article supplement (doi:10.1039/d3sc06702e), 2024-01-01
Supplement: d3sc06702e1.pdf [file d3sc06702e1.pdf]

## *Supporting Information*

### **Designing dynamic coordination bonds in polar hybrid crystals for high-temperature ferroelastic transition**

Yao-Bin Li,<sup>a</sup> Xiao-Xian Chen,<sup>a</sup> Wei-Jian Xu,<sup>b</sup> Ya-Ping Gong,<sup>a</sup> Hui Ye,<sup>a</sup> Zhi-Shuo Wang,<sup>a</sup> and Wei-Xiong Zhang<sup>\*,a</sup>

<sup>a</sup> MOE Key Laboratory of Bioinorganic and Synthetic Chemistry, School of Chemistry, IGCME, Sun Yat-Sen University, Guangzhou 510275, China.

<sup>b</sup> Department of Chemistry & CICECO-Aveiro Institute of Materials, University of Aveiro, 3810-193 Aveiro, Portugal

E-mail: zhangwx6@mail.sysu.edu.cn

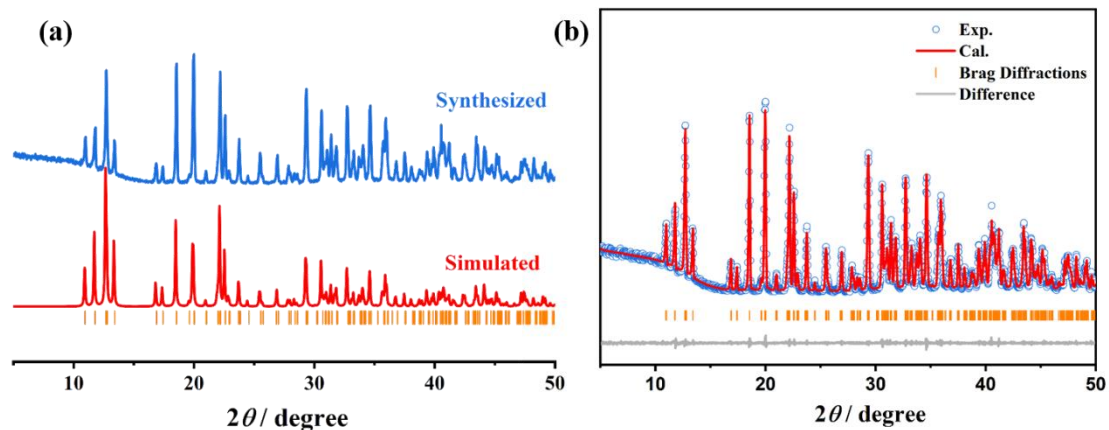

**Fig S1.** (a) The PXRD patterns of simulated and synthesized samples for **1**. (b) Pawley refinement on the PXRD pattern of **1** at 295 K reveals the presence of a monoclinic unit cell:  $a = 8.967(2) \text{ \AA}$ ,  $b = 8.934(2) \text{ \AA}$ ,  $c = 13.891(2) \text{ \AA}$ ,  $\gamma = 115.129(1)^\circ$ ,  $V = 1007.50(2) \text{ \AA}^3$  (residuals  $R_{wp} = 5.03\%$ ,  $R_p = 3.93\%$ ), in space group  $P112_1$ . Experimental pattern (blue circles), calculated pattern (red line), bragg diffractions (orange line) and difference profile (grey line). The difference profile reveal well agreements between the experimental PXRD pattern and the simulated one.

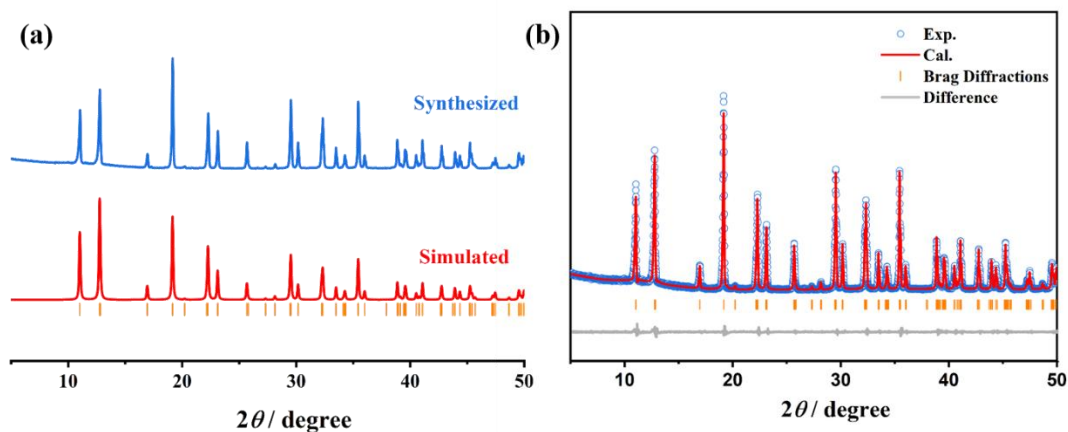

**Fig S2.** (a) The PXRD patterns of simulated and synthesized samples for **2**. (b) Pawley refinement on the PXRD pattern of **2** at 295 K reveals the presence of a hexagonal unit cell:  $a = 9.269(1) \text{ \AA}$ ,  $b = 9.269(1) \text{ \AA}$ ,  $c = 13.803(1) \text{ \AA}$ ,  $V = 1026.99(2) \text{ \AA}^3$  (residuals  $R_{wp} = 5.80\%$ ,  $R_p = 4.40\%$ ), in space group  $P6_3$ . Experimental pattern (blue circles), calculated pattern (red line), bragg diffractions (orange line) and difference profile (grey line). The difference profile reveal well agreements between the experimental PXRD pattern and the simulated one.

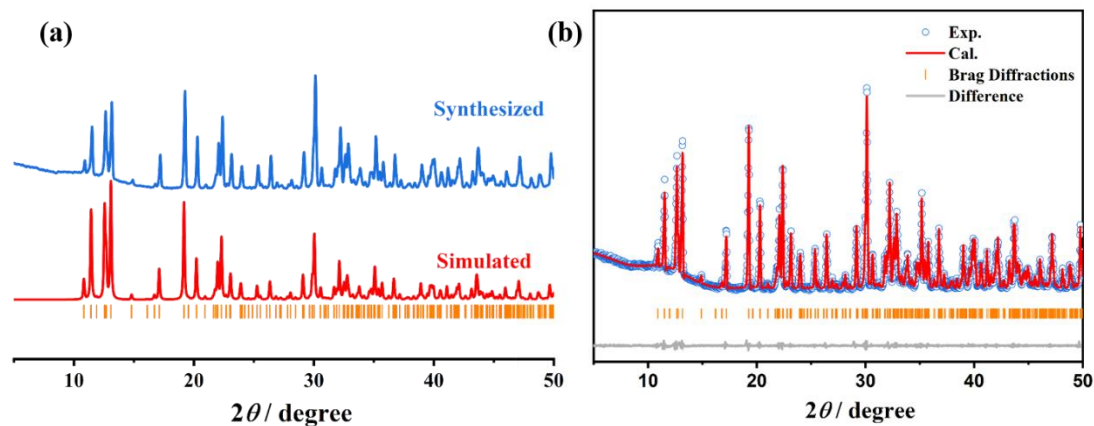

**Fig S3.** (a) The PXRD patterns of simulated and synthesized samples for **3**. (b) Pawley refinement on the PXRD pattern of **3** at 295 K reveals the presence of an orthorhombic unit cell:  $a = 16.331(1) \text{ \AA}$ ,  $b = 8.786(1) \text{ \AA}$ ,  $c = 13.951(1) \text{ \AA}$ ,  $V = 2001.75(2) \text{ \AA}^3$  (residuals  $R_{wp} = 5.18\%$ ,  $R_p = 3.83\%$ ), in space group  $Pna2_1$ . Experimental pattern (blue circles), calculated pattern (red line), bragg diffractions (orange line) and difference profile (grey line). The difference profile reveal well agreements between the experimental PXRD pattern and the simulated one.

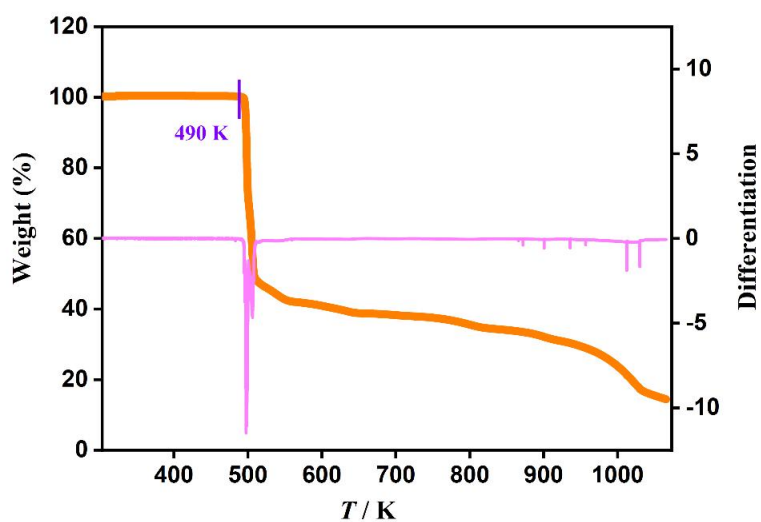

**Fig S4.** Thermogravimetry curve and differentiation curve of **1**.

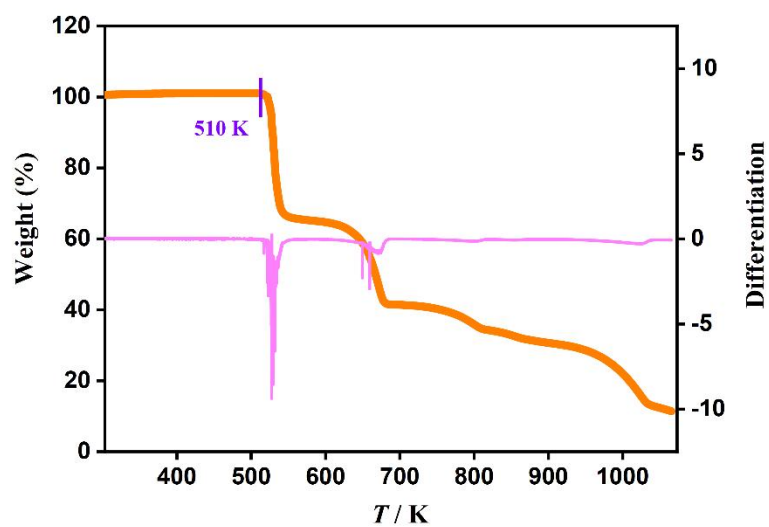

Fig S5. Thermogravimetry curve and differentiation of 2.

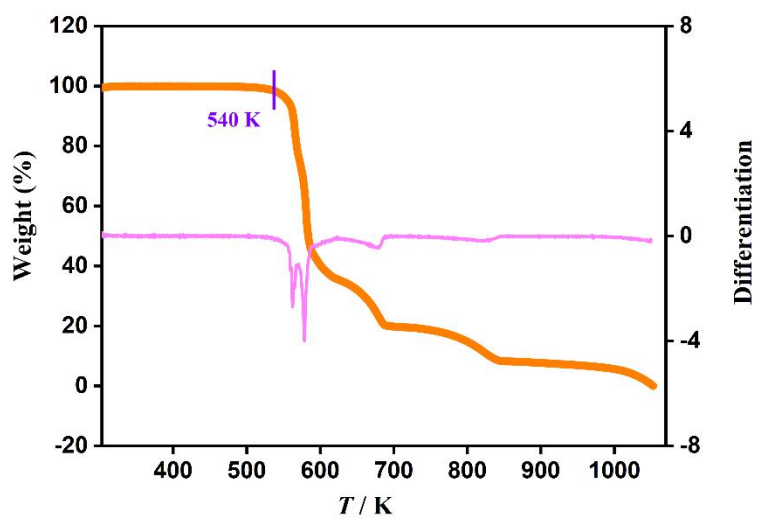

Fig S6. Thermogravimetry curve and differentiation of 3.

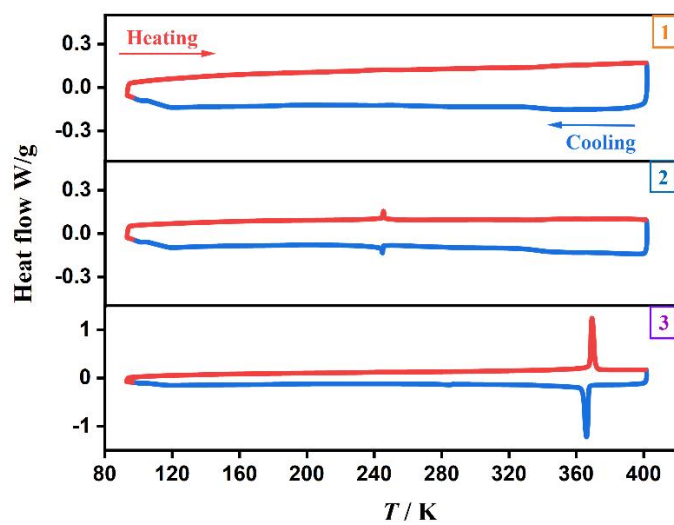

Fig S7. DSC curves in temperature range of 90-400 K for 1, 2, and 3.

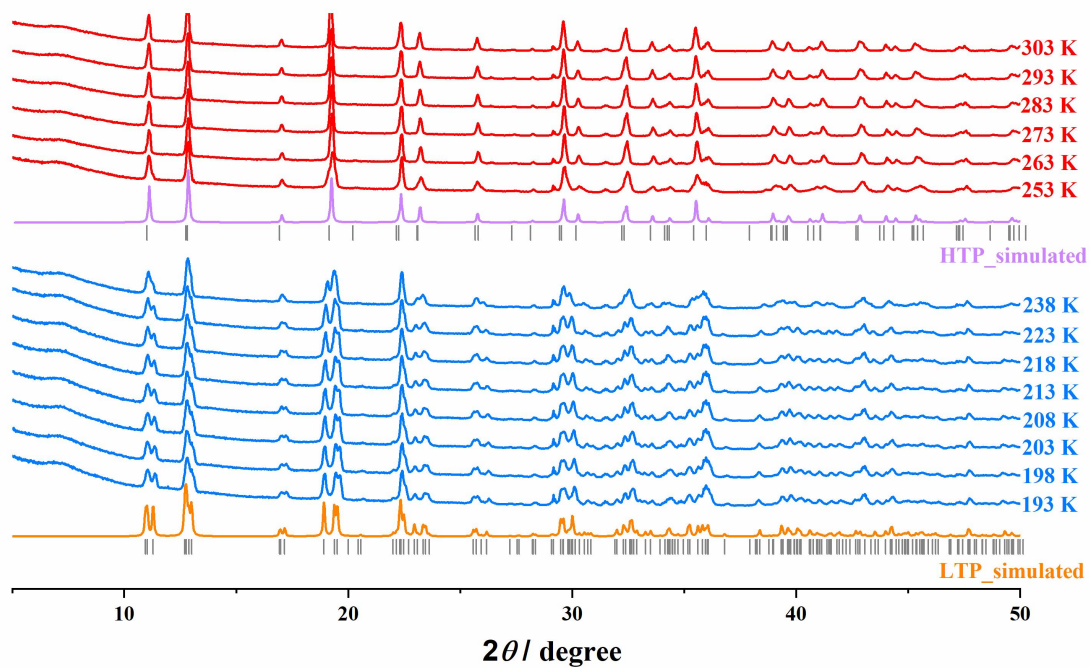

Fig. S8. The variable-temperature experimental PXRD patterns of 2.

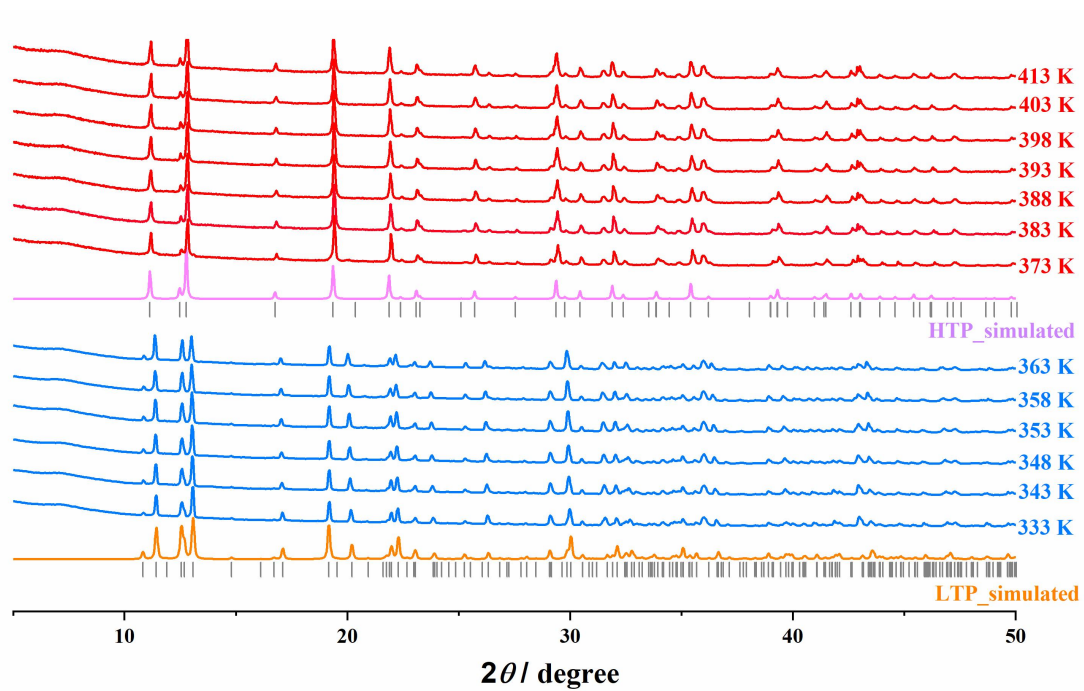

Fig. S9. The variable-temperature experimental PXRD patterns of **3**.

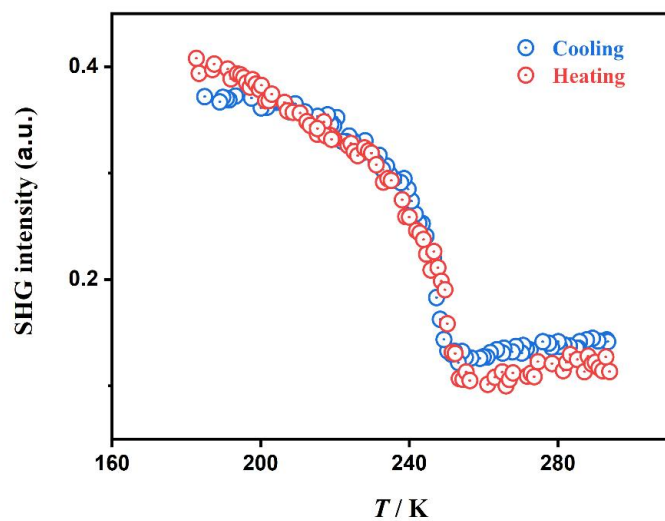

Fig S10. The temperature-dependent SHG signal in the heating and cooling cycle for **2**.

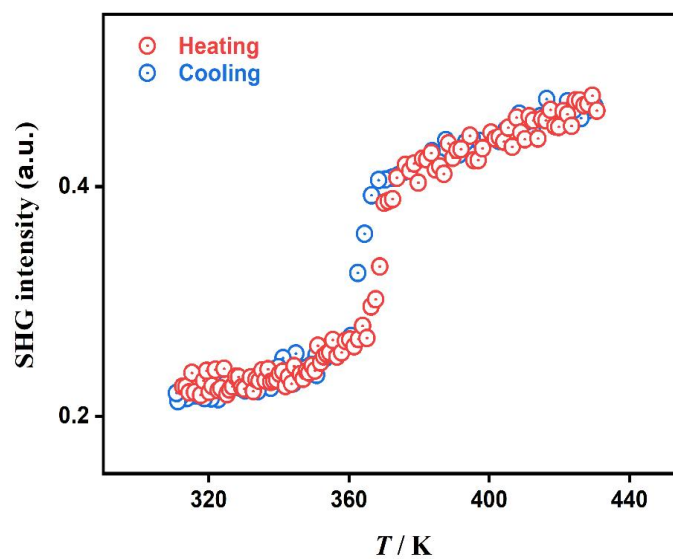

**Fig S11.** The temperature-dependent SHG signal in the heating and cooling cycle for **3**.

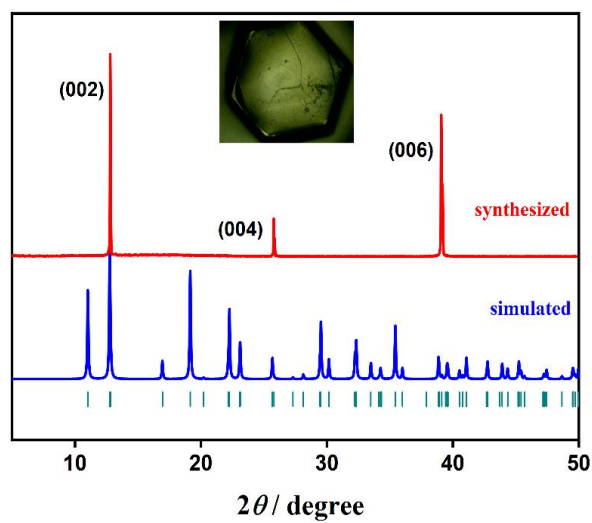

**Fig S12.** The PXRD patterns measured on the largest plane of single crystal of **2** for observation of ferroelastic domains.

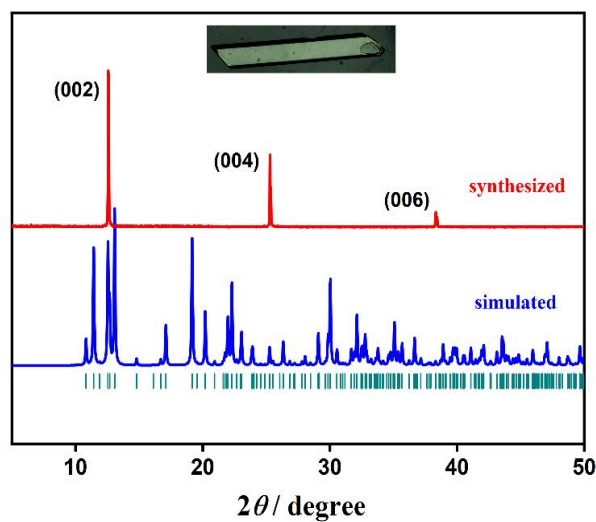

**Fig S13.** The PXRD patterns measured on the largest plane of single crystal of **3** for observation of ferroelastic domains

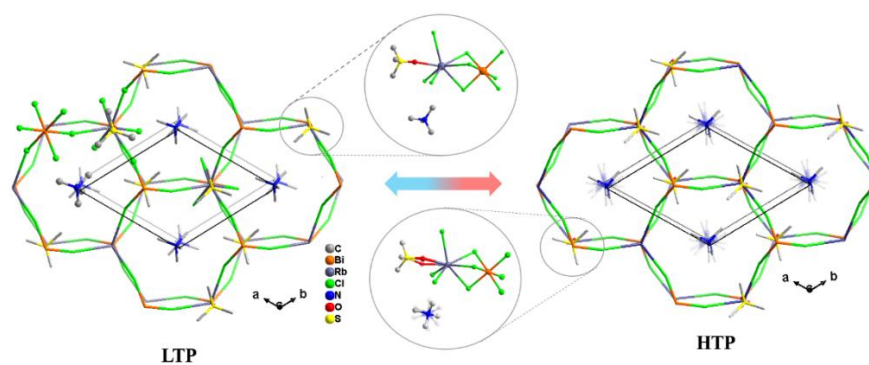

**Fig. S14.** Crystal packing structures along the  $c$  axis in **2\_LTP** and **2\_HTP**. For clarity, all H atoms are omitted.

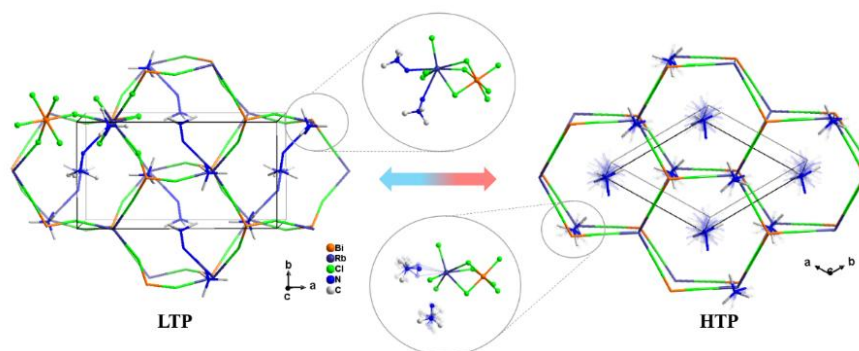

**Fig. S15.** Crystal packing structures along the  $c$ -axis in **3\_LTP** and **3\_HTP**. For clarity, all H atoms are omitted.



**Table S1** Crystal data and structural refinement parameters for **1** and **2**.

| Compound                                                         | (Me <sub>3</sub> SO) <sub>2</sub> [RbBiCl <sub>6</sub> ] ( <b>1</b> ) | (Me <sub>3</sub> SO)(Me <sub>4</sub> N)[RbBiCl <sub>6</sub> ] ( <b>2</b> ) |                         |
|------------------------------------------------------------------|-----------------------------------------------------------------------|----------------------------------------------------------------------------|-------------------------|
| Formula weight                                                   | 693.47                                                                | 674.46                                                                     |                         |
| Phase                                                            | /                                                                     | <b>2_LTP</b>                                                               | <b>2_HTP</b>            |
| Temperature (K)                                                  | 210(2)                                                                | 205(9)                                                                     | 275(3)                  |
| Crystal system                                                   | monoclinic                                                            | monoclinic                                                                 | hexagonal               |
| Space group                                                      | <i>P</i> 112 <sub>1</sub>                                             | <i>P</i> 112 <sub>1</sub>                                                  | <i>P</i> 6 <sub>3</sub> |
| <i>a</i> / Å                                                     | 8.8896(4)                                                             | 9.0947(10)                                                                 | 9.2604(5)               |
| <i>b</i> / Å                                                     | 8.9063(3)                                                             | 9.1571(11)                                                                 | 9.2604(5)               |
| <i>c</i> / Å                                                     | 13.8233(4)                                                            | 13.7302(8)                                                                 | 13.8004(7)              |
| $\gamma$ / °                                                     | 115.000(5)                                                            | 118.189(15)                                                                | 120                     |
| <i>V</i> / Å <sup>3</sup>                                        | 991.90(7)                                                             | 1007.8(2)                                                                  | 1024.91(12)             |
| <i>Z</i>                                                         | 2                                                                     | 2                                                                          | 2                       |
| <i>D<sub>c</sub></i> / (g cm <sup>-3</sup> )                     | 2.322                                                                 | 2.222                                                                      | 2.185                   |
| <i>R</i> <sub>1</sub> [ <i>I</i> > 2σ( <i>I</i> )] <sup>a</sup>  | 0.0250                                                                | 0.0590                                                                     | 0.0358                  |
| <i>wR</i> <sub>2</sub> [ <i>I</i> > 2σ( <i>I</i> )] <sup>b</sup> | 0.0481                                                                | 0.1516                                                                     | 0.0880                  |
| GOF                                                              | 1.038                                                                 | 1.050                                                                      | 1.062                   |
| CCDC number                                                      | 2313518                                                               | 2313517                                                                    | 2313516                 |

**Table S2** Crystal data and structural refinement parameters for **3**.

| Compound                                                         | (Me <sub>3</sub> NNH <sub>2</sub> ) <sub>2</sub> [RbBiCl <sub>6</sub> ] ( <b>3</b> ) |                                   |
|------------------------------------------------------------------|--------------------------------------------------------------------------------------|-----------------------------------|
| Formula weight                                                   | 657.42                                                                               |                                   |
| Phase                                                            | <b>3_LTP</b>                                                                         | <b>3_HTP</b>                      |
| Temperature (K)                                                  | 304(6)                                                                               | 393(5)                            |
| Crystal system                                                   | orthorhombic                                                                         | hexagonal                         |
| Space group                                                      | <i>Pna</i> 2 <sub>1</sub>                                                            | <i>P</i> 6 <sub>3</sub> <i>mc</i> |
| <i>a</i> / Å                                                     | 16.3250(7)                                                                           | 9.1623(8)                         |
| <i>b</i> / Å                                                     | 8.7816(4)                                                                            | 9.1623(8)                         |
| <i>c</i> / Å                                                     | 13.9451(5)                                                                           | 14.1774(10)                       |
| $\gamma$ / °                                                     | 90                                                                                   | 120                               |
| <i>V</i> / Å <sup>3</sup>                                        | 1999.16(14)                                                                          | 1030.71(19)                       |
| <i>Z</i>                                                         | 4                                                                                    | 2                                 |
| <i>D<sub>c</sub></i> / (g cm <sup>-3</sup> )                     | 2.184                                                                                | 2.118                             |
| <i>R</i> <sub>1</sub> [ <i>I</i> > 2σ( <i>I</i> )] <sup>a</sup>  | 0.0399                                                                               | 0.0476                            |
| <i>wR</i> <sub>2</sub> [ <i>I</i> > 2σ( <i>I</i> )] <sup>b</sup> | 0.0770                                                                               | 0.1031                            |
| GOF                                                              | 1.026                                                                                | 1.043                             |
| CCDC number                                                      | 2313519                                                                              | 2313598                           |

$$^a R_1 = \sum ||F_o| - |F_c|| / \sum |F_o|, \quad ^b wR_2 = \{ \sum w[(F_o)^2 - (F_c)^2]^2 / \sum w[(F_o)^2]^2 \}^{1/2}$$

$$^c R_p = \sum |cY_{\text{sim}}(2\theta_i) - I_{\text{exp}}(2\theta_i) + Y_{\text{back}}(2\theta_i)| / \sum |I_{\text{exp}}(2\theta_i)|.$$

$$^d R_{\text{wp}} = \{ w_p [cY_{\text{sim}}(2\theta_i) - I_{\text{exp}}(2\theta_i) + Y_{\text{back}}(2\theta_i)]^2 / \sum w_p [I_{\text{exp}}(2\theta_i)]^2 \}^{1/2}, \quad \text{and } w_p = 1/I_{\text{exp}}(2\theta_i).$$

**Table S3.** Bond Lengths for **1**.

| Atom | Atom             | Length/Å   | Atom | Atom             | Length/Å   |
|------|------------------|------------|------|------------------|------------|
| Bi1  | Cl1              | 2.7192(14) | Rb1  | Cl6 <sup>3</sup> | 3.4483(18) |
| Bi1  | Cl2              | 2.7885(16) | Rb1  | O1               | 2.782(7)   |
| Bi1  | Cl3              | 2.6822(15) | Rb1  | O2               | 2.995(6)   |
| Bi1  | Cl4              | 2.6977(14) | S1   | O1               | 1.432(7)   |
| Bi1  | Cl5              | 2.6490(16) | S1   | C1               | 1.733(6)   |
| Bi1  | Cl6              | 2.7286(17) | S1   | C2               | 1.714(7)   |
| Rb1  | Cl1              | 3.3885(15) | S1   | C3               | 1.704(8)   |
| Rb1  | Cl2              | 3.4444(19) | S2   | O2               | 1.422(6)   |
| Rb1  | Cl3              | 3.4081(18) | S2   | C4               | 1.729(9)   |
| Rb1  | Cl4 <sup>1</sup> | 3.3461(16) | S2   | C5               | 1.688(10)  |
| Rb1  | Cl5 <sup>2</sup> | 3.3630(18) | S2   | C6               | 1.712(7)   |

<sup>1</sup>1-X, 1-Y, 1/2+Z; <sup>2</sup>-X, -Y, 1/2+Z; <sup>3</sup>1-X, -Y, 1/2+Z.

**Table S4.** Bond Lengths for **2** at LTP.

| Atom | Atom             | Length/Å | Atom | Atom | Length/Å  |
|------|------------------|----------|------|------|-----------|
| Bi1  | Cl1              | 2.697(6) | Rb1  | Cl6  | 3.321(7)  |
| Bi1  | Cl2              | 2.703(6) | Rb1  | O1   | 2.74(4)   |
| Bi1  | Cl3              | 2.714(6) | S1   | O1   | 1.42(4)   |
| Bi1  | Cl4              | 2.733(7) | S1   | C1   | 1.73(3)   |
| Bi1  | Cl5              | 2.668(6) | S1   | C2   | 1.73(2)   |
| Bi1  | Cl6              | 2.745(6) | S1   | C3   | 1.71(3)   |
| Rb1  | Cl1 <sup>1</sup> | 3.334(7) | N1   | C4   | 1.487(18) |
| Rb1  | Cl2 <sup>2</sup> | 3.404(7) | N1   | C5   | 1.484(18) |
| Rb1  | Cl3              | 3.324(7) | N1   | C6   | 1.478(18) |
| Rb1  | Cl4              | 3.309(7) | N1   | C7   | 1.474(18) |
| Rb1  | Cl5 <sup>3</sup> | 3.415(7) |      |      |           |

<sup>1</sup>1-X, 1-Y, -1/2+Z; <sup>2</sup>1-X, -Y, -1/2+Z; <sup>3</sup>2-X, 1-Y, -1/2+Z.

**Table S5.** Bond Lengths for **3** at LTP.

| Atom | Atom             | Length/Å | Atom | Atom             | Length/Å  |
|------|------------------|----------|------|------------------|-----------|
| Bi1  | Cl1              | 2.685(3) | Rb1  | Cl6 <sup>3</sup> | 3.217(3)  |
| Bi1  | Cl2              | 2.736(3) | Rb1  | N1               | 3.119(9)  |
| Bi1  | Cl3              | 2.717(3) | Rb1  | N3               | 3.535(11) |
| Bi1  | Cl4              | 2.716(3) | N1   | N2               | 1.435(13) |
| Bi1  | Cl5              | 2.710(3) | N2   | C1               | 1.479(15) |
| Bi1  | Cl6              | 2.710(3) | N2   | C2               | 1.472(16) |
| Rb1  | Cl1              | 3.570(4) | N2   | C3               | 1.470(14) |
| Rb1  | Cl2              | 3.277(3) | N3   | N4               | 1.446(14) |
| Rb1  | Cl3 <sup>1</sup> | 3.401(3) | N4   | C4               | 1.469(14) |
| Rb1  | Cl4 <sup>2</sup> | 3.387(3) | N4   | C5               | 1.501(17) |
| Rb1  | Cl5              | 3.420(3) | N4   | C6               | 1.464(19) |

<sup>1</sup>1/2-X, -1/2+Y, 1/2+Z; <sup>2</sup>1-X, 2-Y, 1/2+Z; <sup>3</sup>1/2-X, 1/2+Y, 1/2+Z.

**Table S6.** Pawley refinements results on the variable-temperature powder X-ray diffraction patterns of **2**.

| Phase | Temperature / K | <i>a</i> / Å | <i>b</i> / Å | <i>c</i> / Å | <i>V</i> / Å <sup>3</sup> | <i>R</i> <sub>p</sub> / % | <i>R</i> <sub>wp</sub> / % |
|-------|-----------------|--------------|--------------|--------------|---------------------------|---------------------------|----------------------------|
| LTP   | 193             | 9.067(1)     | 9.159(1)     | 13.704(2)    | 1004.66                   | 2.80                      | 4.46                       |
|       | 198             | 9.075(1)     | 9.163(1)     | 13.710(2)    | 1005.91                   | 2.78                      | 4.49                       |
|       | 203             | 9.082(1)     | 9.167(1)     | 13.715(2)    | 1006.91                   | 2.85                      | 4.50                       |
|       | 208             | 9.091(1)     | 9.172(1)     | 13.719(2)    | 1008.07                   | 2.77                      | 4.51                       |
|       | 213             | 9.101(1)     | 9.178(1)     | 13.727(1)    | 1009.79                   | 2.80                      | 4.41                       |
|       | 218             | 9.108(1)     | 9.182(1)     | 13.732(1)    | 1010.59                   | 2.74                      | 4.36                       |
|       | 223             | 9.118(1)     | 9.188(1)     | 13.737(1)    | 1011.87                   | 2.67                      | 4.27                       |
|       | 238             | 9.144(6)     | 9.200(6)     | 13.753(9)    | 1013.53                   | 2.81                      | 4.64                       |
| HTP   | 253             | 9.248(1)     | 9.248(1)     | 13.783(1)    | 1020.87                   | 2.88                      | 4.56                       |
|       | 263             | 9.253(1)     | 9.253(1)     | 13.787(1)    | 1022.27                   | 2.80                      | 4.35                       |
|       | 273             | 9.258(1)     | 9.258(1)     | 13.792(1)    | 1023.75                   | 2.76                      | 4.23                       |
|       | 283             | 9.263(1)     | 9.263(1)     | 13.798(1)    | 1025.30                   | 2.76                      | 4.17                       |
|       | 293             | 9.267(1)     | 9.267(1)     | 13.802(1)    | 1026.48                   | 2.73                      | 4.00                       |
|       | 303             | 9.272(1)     | 9.272(1)     | 13.808(1)    | 1028.03                   | 2.72                      | 4.09                       |

**Table S7.** Pawley refinements results on the variable-temperature powder X-ray diffraction patterns of **3**.

| Phase             | Temperature / K | $a / \text{\AA}$ | $b / \text{\AA}$ | $c / \text{\AA}$ | $V / \text{\AA}^3$ | $R_p / \%$ | $R_{wp} / \%$ |
|-------------------|-----------------|------------------|------------------|------------------|--------------------|------------|---------------|
| LTP               | 333             | 16.321(1)        | 8.817(1)         | 13.985(1)        | 2012.47(1)         | 2.80       | 4.29          |
|                   | 343             | 16.309(1)        | 8.831(1)         | 14.001(1)        | 2016.49(1)         | 2.55       | 3.90          |
|                   | 348             | 16.303(1)        | 8.839(1)         | 14.010(1)        | 2018.87(1)         | 2.65       | 3.94          |
|                   | 353             | 16.294(1)        | 8.849(1)         | 14.021(1)        | 2021.63(1)         | 2.61       | 3.89          |
|                   | 358             | 16.285(1)        | 8.860(1)         | 14.029(1)        | 2024.18(1)         | 2.60       | 3.82          |
|                   | 363             | 16.273(1)        | 8.875(1)         | 14.044(1)        | 2028.28(1)         | 2.49       | 3.68          |
| *3 <sup>1/2</sup> |                 |                  |                  |                  |                    |            |               |
| HTP               | 373             | 15.864(1)        | 9.159(1)         | 14.145(1)        | 2055.25(1)         | 2.81       | 4.10          |
|                   | 383             | 15.872(1)        | 9.164(1)         | 14.158(1)        | 2059.29(1)         | 2.52       | 3.66          |
|                   | 388             | 15.875(1)        | 9.165(1)         | 14.166(1)        | 2061.07(1)         | 2.52       | 3.65          |
|                   | 393             | 15.877(1)        | 9.167(1)         | 14.172(1)        | 2062.66(1)         | 2.47       | 3.66          |
|                   | 398             | 15.881(1)        | 9.169(1)         | 14.178(1)        | 2064.50(1)         | 2.55       | 3.70          |
|                   | 403             | 15.885(1)        | 9.171(1)         | 14.188(1)        | 2066.93(1)         | 2.55       | 3.76          |
|                   | 413             | 15.891(1)        | 9.175(1)         | 14.201(1)        | 2070.51(1)         | 2.66       | 3.96          |

**Table S8.** Liner fitting results of variable-temperature cell parameters of **2**.

| Phase | Fitting equations              | R <sup>2</sup> | Deduced parameters at $T_1$ (245K) |
|-------|--------------------------------|----------------|------------------------------------|
| LTP   | $a = 0.00172T + 8.73347$       | 0.999          | 9.155 Å                            |
|       | $b = 0.000938655T + 8.97736$   | 0.997          | 9.207 Å                            |
|       | $c = 0.00109T + 13.49312$      | 0.998          | 13.760 Å                           |
|       | $\beta = 0.01406T + 115.29098$ | 0.997          | 118.878°                           |
|       |                                |                | $V = 1015.61 \text{\AA}^3$         |
| HTP   | $a = 0.000477143T + 9.12752$   | 0.999          | 9.244 Å                            |
|       | $b = 0.000477143T + 9.12752$   | 0.999          | 9.244 Å                            |
|       | $c = 0.000502857T + 13.65521$  | 0.997          | 13.778 Å                           |
|       |                                |                | $V = 1019.62 \text{\AA}^3$         |

**Table S9.** Liner fitting results of variable-temperature cell parameters of **3**.

| Phase | Fitting equations            | R <sup>2</sup> | Deduced parameters<br>at $T_1$ (369 K) |
|-------|------------------------------|----------------|----------------------------------------|
| LTP   | $a = -0.00158T + 16.84897$   | 0.978          | 16.267 Å                               |
|       | $b = 0.00192T + 8.17544$     | 0.980          | 8.884 Å                                |
|       | $c = 0.00192T + 13.34224$    | 0.992          | 14.051 Å                               |
|       |                              |                | $V = 2030.59 \text{ Å}^3$              |
| HTP   | $a = 0.00066098T + 15.61811$ | 0.998          | 15.862 Å                               |
|       | $b = 0.000370667T + 9.02142$ | 0.989          | 9.158 Å                                |
|       | $c = 0.00142T + 13.61464$    | 0.998          | 14.139 Å                               |
|       |                              |                | $V = 2053.89 \text{ Å}^3$              |

**Table S10.** Thermal expansion coefficients of the principal axes in **2** and **3**.

| Phase        | $T/K$   | Principl<br>eaxis | Directions |         |        | $\alpha/\text{MK}^{-1}$ | $\beta_v/\text{MK}^{-1}$ |
|--------------|---------|-------------------|------------|---------|--------|-------------------------|--------------------------|
|              |         |                   | a          | b       | c      |                         |                          |
| <b>2_LTP</b> | 193-238 | X <sub>1</sub>    | 0.6297     | 0.7768  | 0.0000 | -68(2)                  |                          |
|              |         | X <sub>2</sub>    | 0.0000     | 0.0000  | 1.0000 | 79(1)                   | 240(1)                   |
|              |         | X <sub>3</sub>    | -0.8841    | 0.4674  | 0.0000 | 228(2)                  |                          |
| <b>2_HTP</b> | 253-303 | X <sub>1</sub>    | 0.0000     | 0.0000  | 1.0000 | 36(1)                   |                          |
|              |         | X <sub>2</sub>    | 0.0000     | 1.0000  | 0.0000 | 51(1)                   | 140(1)                   |
|              |         | X <sub>3</sub>    | -0.8944    | -0.4473 | 0.0000 | 51(1)                   |                          |
| <b>3_LTP</b> | 333-363 | X <sub>1</sub>    | -1.0000    | 0.0000  | 0.0000 | 96(7)                   |                          |
|              |         | X <sub>2</sub>    | 0.0000     | 0.0000  | 1.0000 | 140(7)                  | 260(17)                  |
|              |         | X <sub>3</sub>    | 0.0000     | -1.0000 | 0.0000 | 215(16)                 |                          |
| <b>3_HTP</b> | 373-413 | X <sub>1</sub>    | 1.0000     | 0.0000  | 0.0000 | 42(1)                   |                          |
|              |         | X <sub>2</sub>    | 0.0000     | 1.0000  | 0.0000 | 42(1)                   | 185(1)                   |
|              |         | X <sub>3</sub>    | 0.0000     | 0.0000  | 1.0000 | 99(1)                   |                          |

### The calculation of the spontaneous strain

For the present  $6F2$  species of **2**, the spontaneous strain tensor is given as:

$$\varepsilon_{ij} = \begin{bmatrix} \frac{a \sin \gamma}{a_0 \sin \gamma_0} - 1 & \frac{1}{2} \left( \frac{a \cos \gamma}{a_0 \sin \gamma_0} - \frac{b \cos \gamma_0}{b_0 \sin \gamma_0} \right) & 0 \\ \frac{1}{2} \left( \frac{a \cos \gamma}{a_0 \sin \gamma_0} - \frac{b \cos \gamma_0}{b_0 \sin \gamma_0} \right) & \frac{b}{b_0} - 1 & 0 \\ 0 & 0 & \frac{c}{c_0} - 1 \end{bmatrix} \quad (\text{equation 1})$$

In the equation,  $a$ ,  $b$ ,  $c$ , and  $\gamma$  refer to the low-symmetry form of **2** (at LTP), and  $a_0$ ,  $b_0$ ,  $c_0$ , and  $\gamma_0$  are the cell parameters of high-symmetry form (at HTP). The cell parameters are from deduced results in Table S8.

For the present  $6mmFmm2$  species of **3**, the spontaneous strain tensor is given as:

$$\varepsilon_{ij} = \begin{bmatrix} \frac{a}{a_0} - 1 & 0 & 0 \\ 0 & \frac{b}{b_0} - 1 & 0 \\ 0 & 0 & \frac{c}{c_0} - 1 \end{bmatrix} \quad (\text{equation 2})$$

In the equation,  $a$ ,  $b$ ,  $c$  refer to the low-symmetry form of **3** (at LTP), and  $a_0$ ,  $b_0$ ,  $c_0$ , and  $\gamma_0$  are the converted orthorhombic cell parameters of high-symmetry form (at HTP). The cell parameters are from deduced results in Table S9.

The total spontaneous strain  $\varepsilon_{ss}$  can be given as: <sup>S1-S3</sup>

$$\varepsilon_{ss} = \sqrt{\sum_{ij} \varepsilon_{ij}^2} \quad (i = 1,2,3; j = 1,2,3) \quad (\text{equation 3})$$

### References

- S1. K. Aizu, *J. Phys. Soc. Jpn.*, 1970, **28**, 706-716.
- S2. J. Sapriel, *Phys. Rev. B*, 1975, **12**, 5128-5140
- S3. M. A. Carpenter, E. K. H. Salje and A. Graeme-Barber, *Eur. J. Mineral.*, 1998, **10**, 621-691.
